# Supplementary material for: Phosphorescent immunosensor for simple and sensitive detection of microcystin-LR in water
Source: Royal Society of Chemistry journal article supplement (doi:10.1039/c9ra02141h), 2019-01-01
Supplement: c9ra02141h1.pdf [file c9ra02141h1.pdf]

## Supplementary information

### Figure captions

**Fig. S1.** (a) Effect of pH on the RTP intensity of the antiMC-LR/QDs hybrids. (b) Effect of NaCl concentration on the RTP intensity of the antiMC-LR/QDs hybrids. (c) Time-dependent RTP intensity of the antiMC-LR/QDs hybrids.

**Fig . S2.** Selectivity of the RTP assay for MC-LR over other substances. The concentration of MC-LR was 20µg/L and that of other substances was 500µg/L .

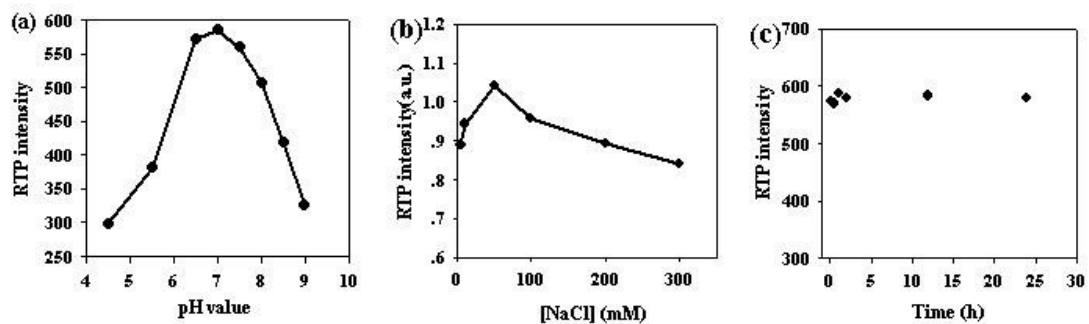

**Fig. S1.** (a) Effect of pH on the RTP intensity of the antiMC-LR/QDs hybrids. (b) Effect of NaCl concentration on the RTP intensity of the antiMC-LR/QDs hybrids. (c) Time-dependent RTP intensity of the antiMC-LR/QDs hybrids.

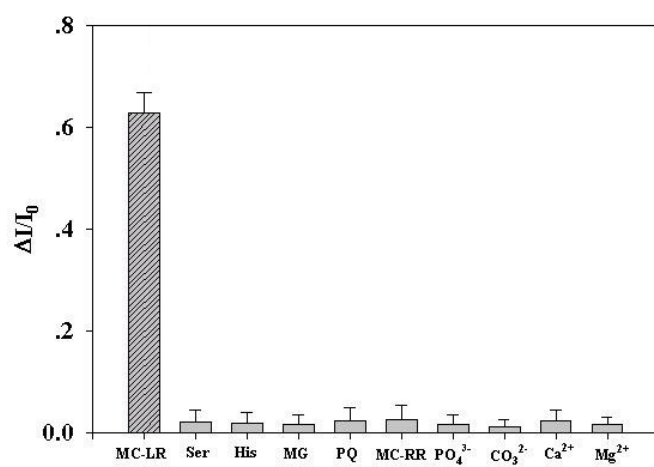

**Fig.S2** Selectivity of the RTP assay for MC-LR over other substances. The concentration of MC-LR was 20 $\mu\text{g/L}$  and that of other substances was 500 $\mu\text{g/L}$  .
